# Supplementary material
Source: publisher figshare collection journal article supplement (https://gsapubs.figshare.com/articles/dataset/_/24592998)
Supplement: Supplementary file 3 [file 1]

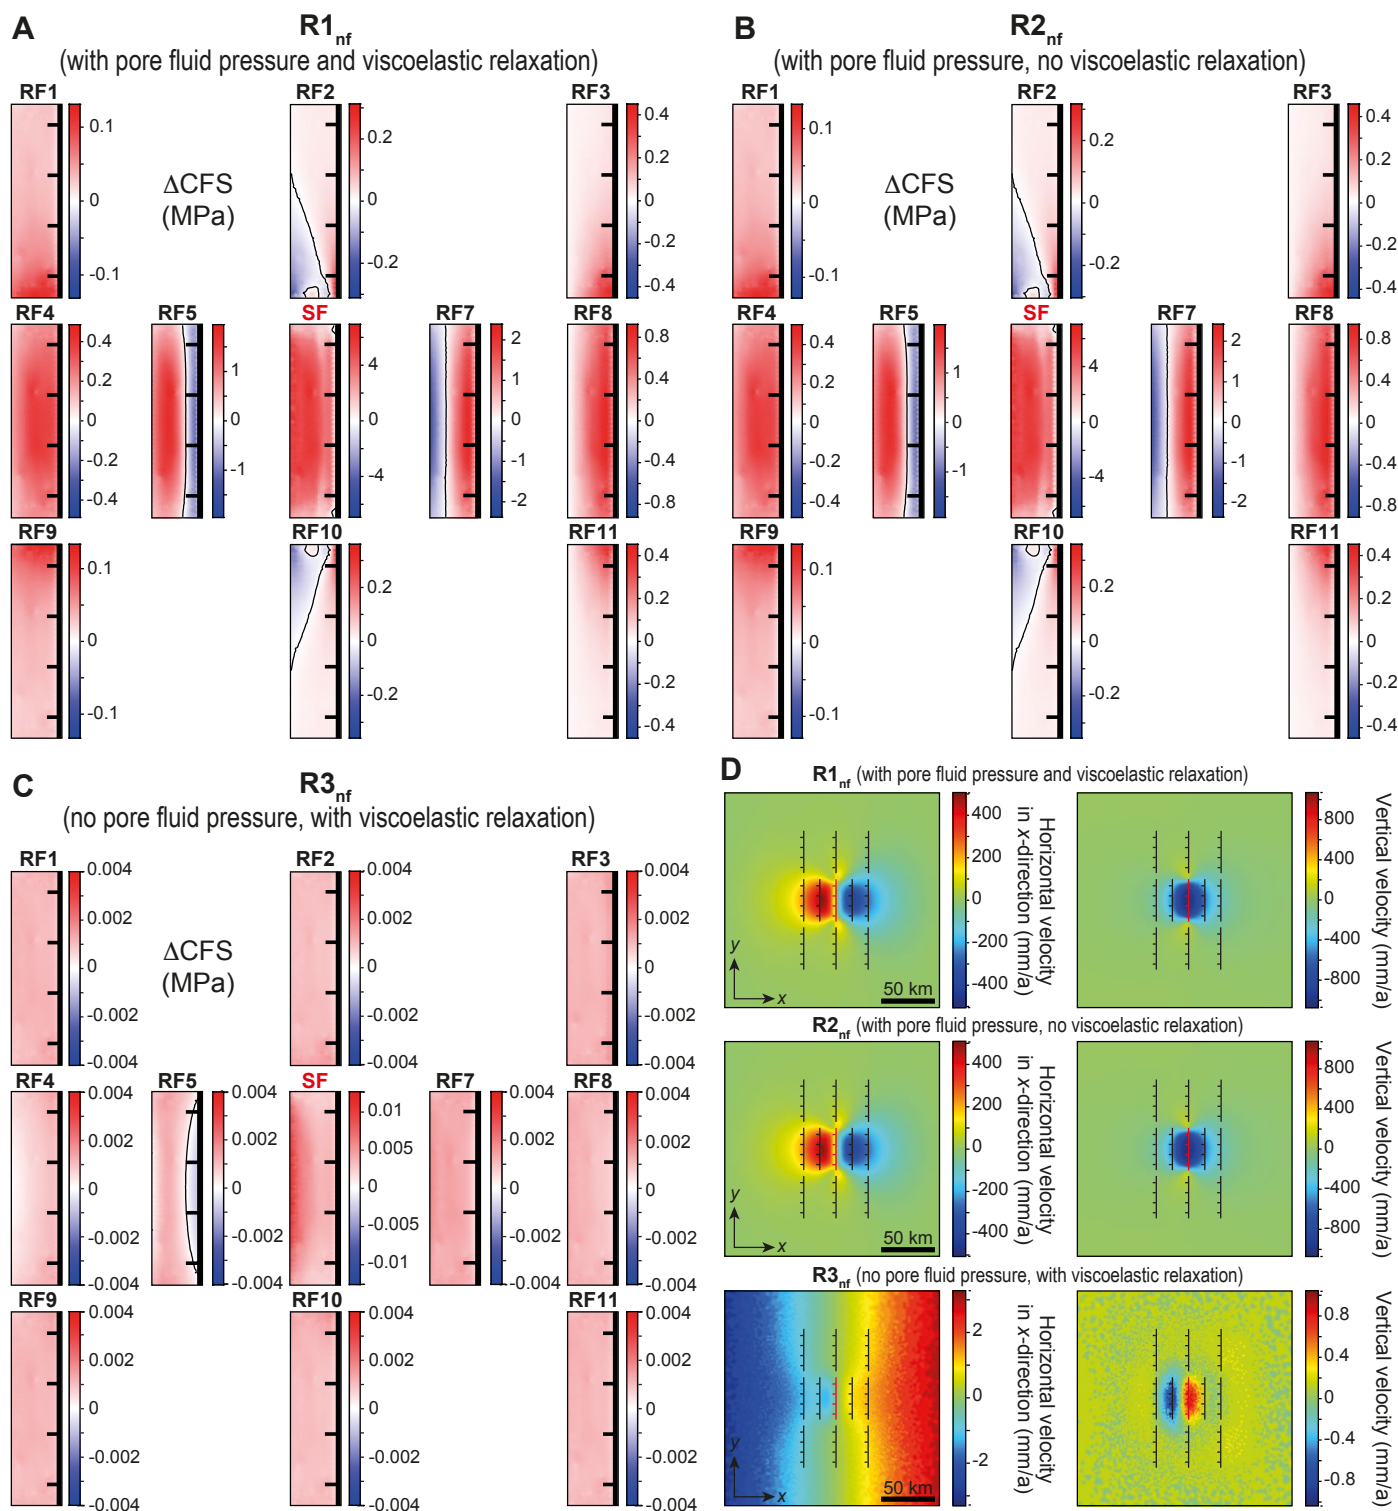

Figure 3 is interactive. Please open the figure in Adobe Acrobat or Adobe Reader to interactively view the different layers in this figure. If viewing the full-text version of this paper, please visit <https://doi.org/10.1130/GEOS.S.XXXXXX>.

**Figure 3. (interactive).** (A–C) Postseismic Coulomb stress changes ( $\Delta CFS$ ) from the normal fault reference models with pore fluid pressure changes and viscoelastic relaxation ( $R1_{nf}$ ) (A), with pore fluid pressure changes but without viscoelastic relaxation ( $R2_{nf}$ ) (B), and with viscoelastic relaxation but without pore fluid pressure changes ( $R3_{nf}$ ) (C). SF—source fault; RF—receiver fault. Distances between faults in fault array are not to scale. The fault planes are 40 km long and 18 km wide (see Fig. 2a). Thin black lines indicate the zero lines of the Coulomb stress changes. (D) Horizontal velocity field in the x-direction and vertical velocity field in the three normal fault reference models. Please open the figure in Adobe Acrobat or Adobe Reader to interactively view the different layers in this figure.
