# Supplementary material
Source: publisher figshare collection journal article supplement (https://gsapubs.figshare.com/articles/dataset/_/24592998)
Supplement: Supplementary file 6 [file 1]

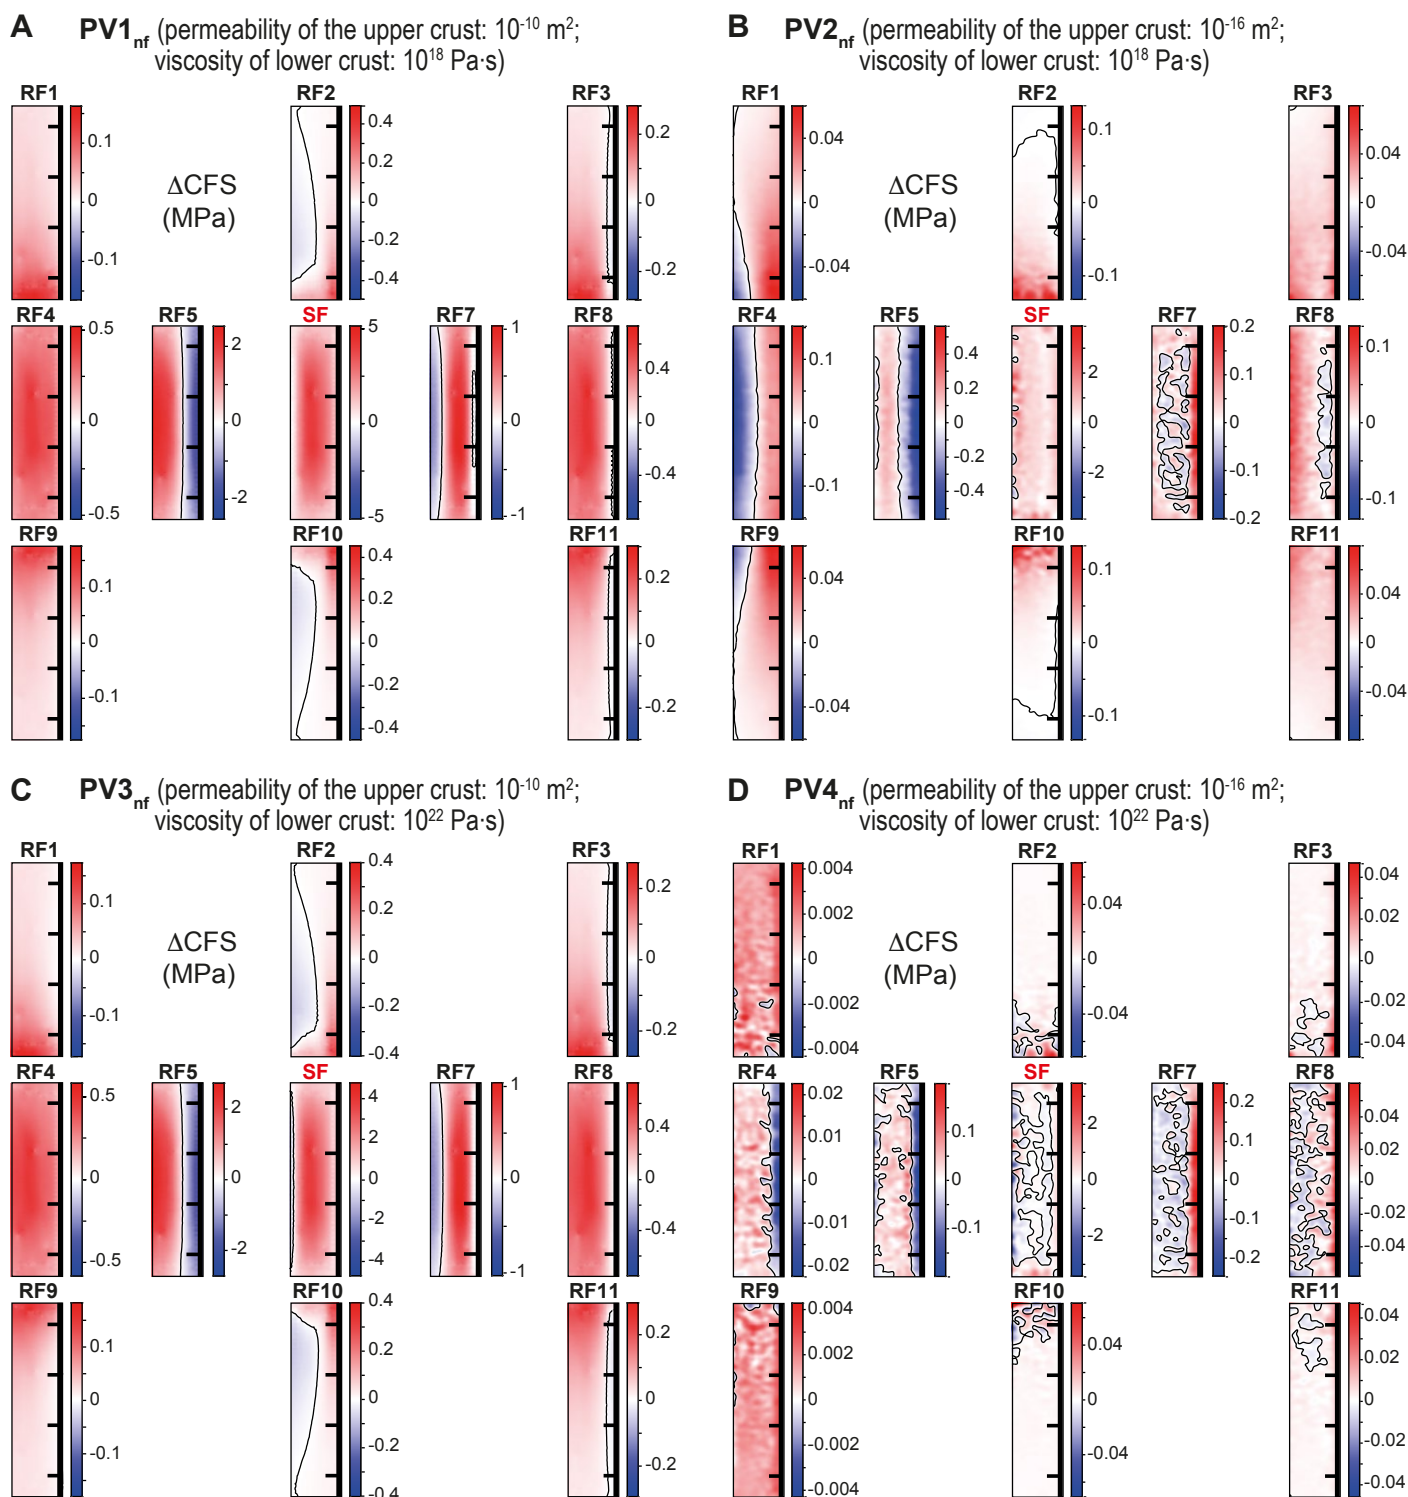

Figure 9 is interactive. Please open the figure in Adobe Acrobat or Adobe Reader to interactively view the different layers in this figure. If viewing the full-text version of this paper, please visit <https://doi.org/10.1130/GES02672>.

Figure 9. (interactive). Postseismic Coulomb stress changes ( $\Delta\text{CFS}$ ) from normal fault models with end-member configurations combining high permeability of the upper crust with low viscosity of the lower crust ( $PV1_{nf}$ ) (A), low permeability with low viscosity ( $PV2_{nf}$ ) (B), high permeability with high viscosity ( $PV3_{nf}$ ) (C), and low permeability with high viscosity ( $PV4_{nf}$ ) (D). SF—source fault; RF—receiver fault. The fault planes are 40 km long and 18 km wide (see Fig. 2a). Thin black lines indicate the zero lines of the Coulomb stress changes. Distances between faults in fault array are not to scale. Please open the figure in Adobe Acrobat or Adobe Reader to interactively view the different layers in this figure.
