# Supplementary material
Source: publisher figshare collection journal article supplement (https://gsapubs.figshare.com/articles/dataset/_/24592998)
Supplement: Supplementary file 7 [file 1]

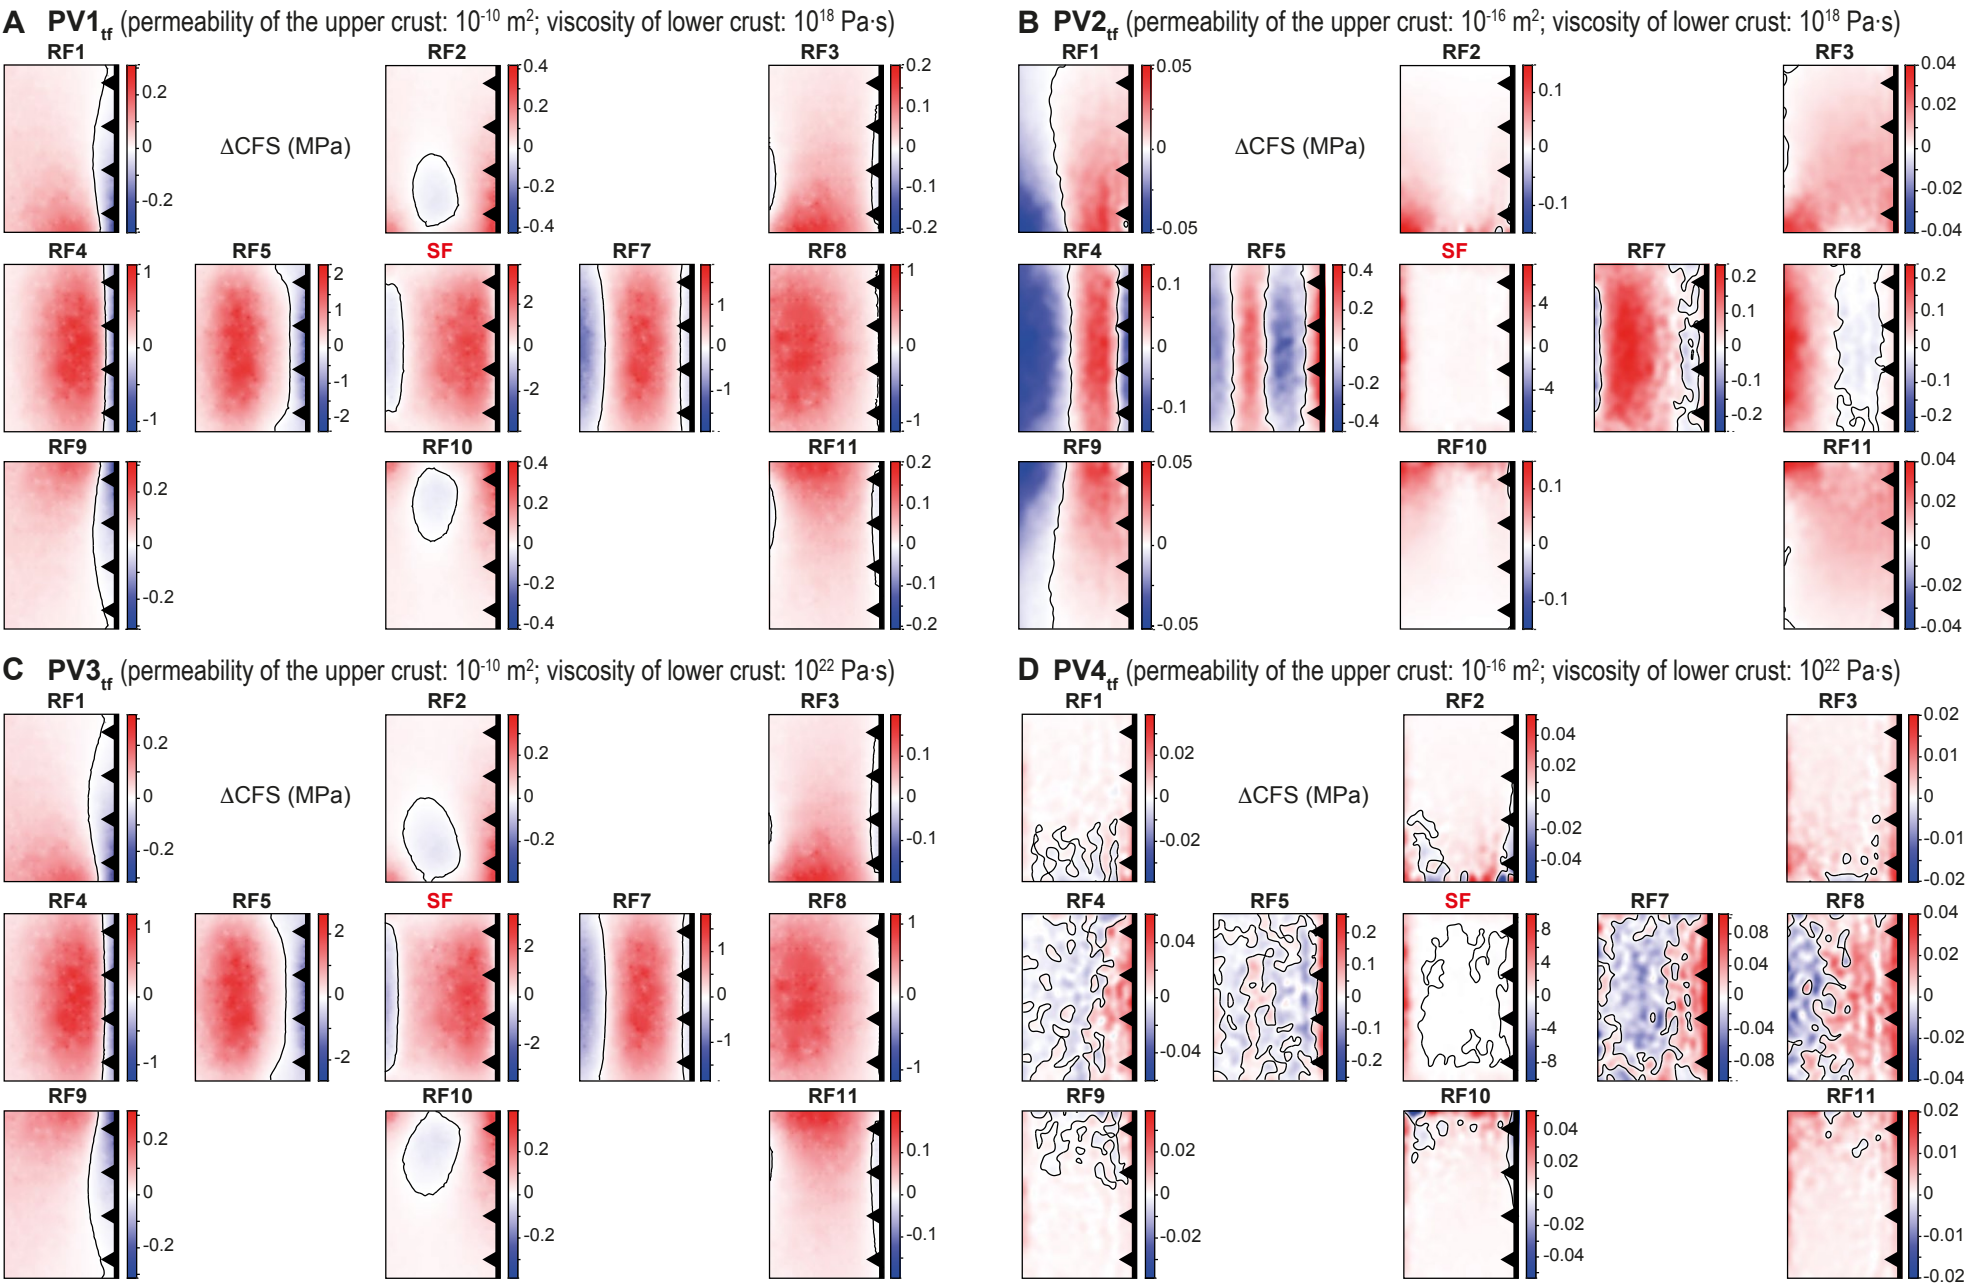

Click on radio button to view Coulomb stress changes ( $\Delta\text{CFS}$ ) for

☐ 1st month   ☐ 2nd month   ☐ 3rd month   ☐ 1st year   ☐ 2nd year   ☐ 5th year   ☐ 10th year   ☐ 50th year
