# Supplementary material
Source: publisher figshare collection journal article supplement (https://gsapubs.figshare.com/articles/dataset/_/24592998)
Supplement: Supplementary file 8 [file 1]

Figure 7 is interactive. Please open the figure in Adobe Acrobat or Adobe Reader to interactively view the different layers in this figure. If viewing the full-text version of this paper, please visit <https://doi.org/10.1130/GEOS.S.XXXXXX>.

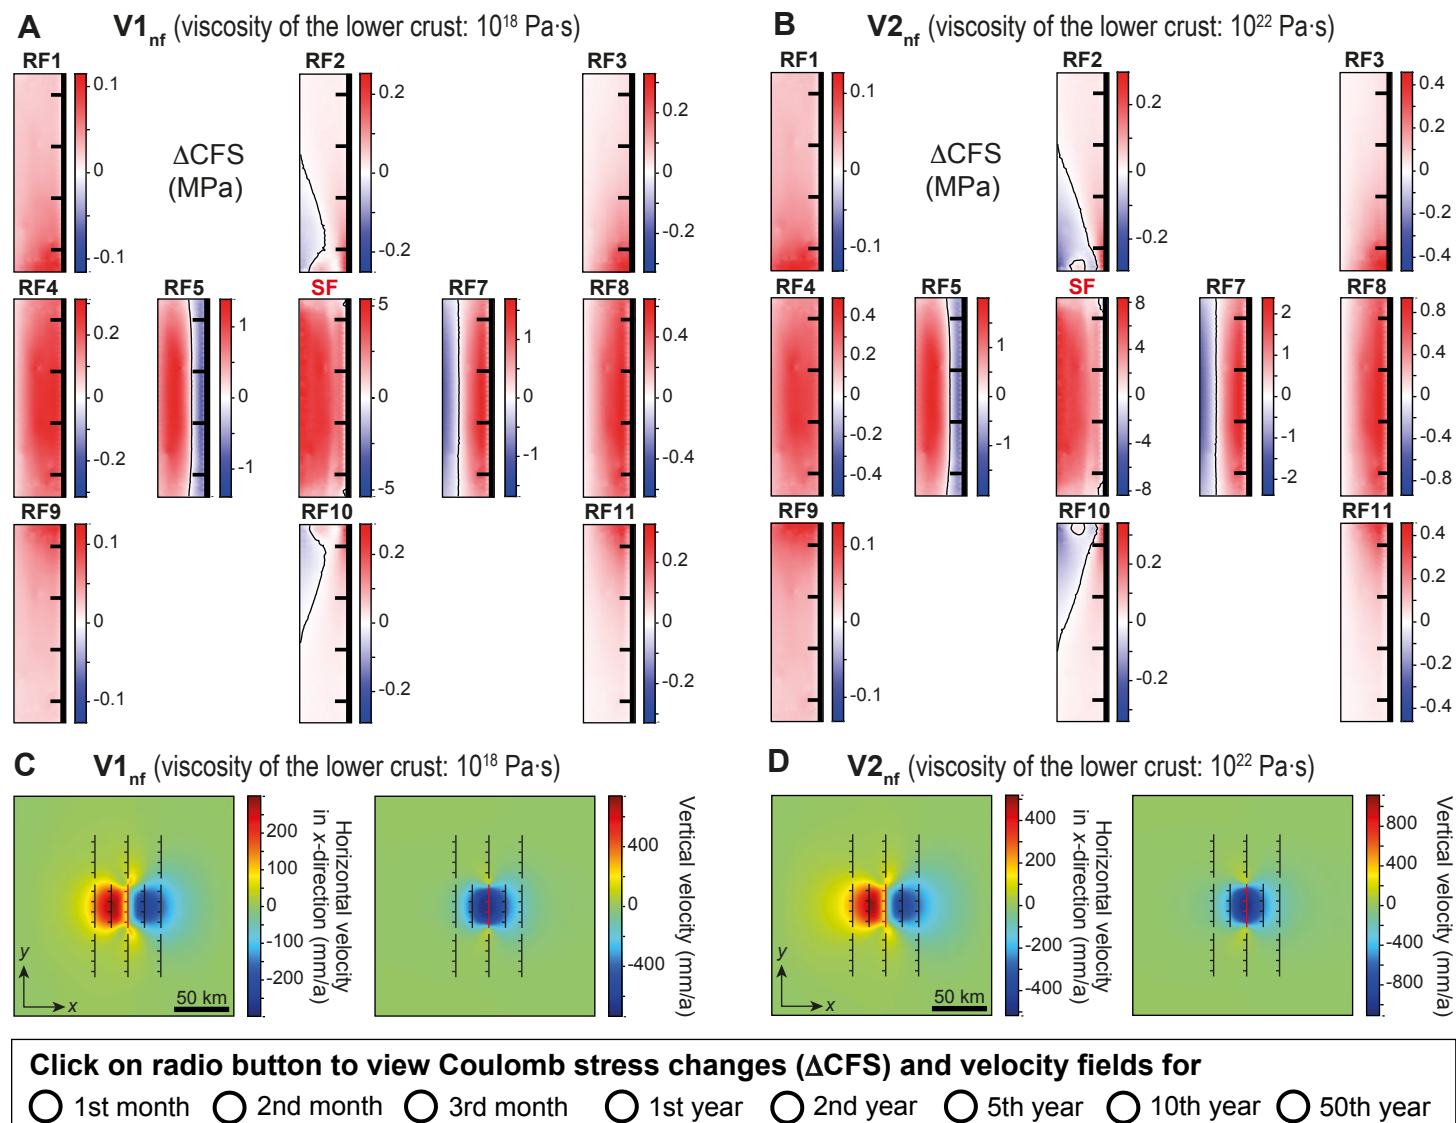

Figure 7. (interactive). (A,B) Postseismic Coulomb stress changes ( $\Delta CFS$ ) from normal fault models with lower viscosity ( $V1_{nf}$ ;  $10^{18}$  Pa-s) (A) and higher viscosity ( $V2_{nf}$ ;  $10^{22}$  Pa-s) (B) for the lower crust than in the reference model. SF—source fault; RF—receiver fault. The fault planes are 40 km long and 18 km wide (see Fig. 2a). Thin black lines indicate the zero lines of the Coulomb stress changes. Distances between faults in fault array are not to scale. (C,D) Horizontal velocity field in the x-direction and vertical velocity field in models  $V1_{nf}$  (C) and  $V2_{nf}$  (D). Please open the figure in Adobe Acrobat or Adobe Reader to interactively view the different layers in this figure.
